# Supplementary material
Source: PubMed Central journal article supplement (PMC3707995)
Supplement: supp_121732_case-science-1-at.pdf [file supp_121732_case-science-1-at.pdf]

## **Appendix 1 (as supplied by the authors): Patient handout**

Your child has been prescribed a drug called Isoniazid to prevent Tuberculosis disease from developing. This medicine usually has few or no side effects. Very rarely the medicine can affect the liver. If this occurs your child may:

- Vomit
- Complain of tummy ache
- Not want to eat
- Feel very tired
- Become yellow around the white part of the eyes

If these symptoms or signs occur STOP GIVING THE MEDICINE and call us. \_\_\_\_\_ can be reached at telephone # \_\_\_\_\_ or be paged at \_\_\_\_\_. The clinic nurse can be reached at \_\_\_\_\_. Otherwise call \_\_\_\_\_ and ask to speak to the Infectious Diseases Fellow on call.

**Don't start the medicine again until the child has been checked!!!**
